# Supplementary material for: Causal relationship between gut microbiota and prostate cancer contributes to the gut-prostate axis: insights from a Mendelian randomization study
Source: Discov Oncol. 2024 Mar 3;15:58. doi: 10.1007/s12672-024-00925-1 (PMC10909808; doi:10.1007/s12672-024-00925-1)
Supplement: Supplementary file 2 — Additional file 2: Additional tables. [file 12672_2024_925_MOESM2_ESM.xls]

## Sheet: Table S1
Table S1. SNPs used as instrumental variables from gut microbiome and Pca GWASs (P < 1 × 10-5) in PRACTICAL.
Classification	Bacterial traits	SNP	EA	OA	EAF	R2 (%)	F	gut microbiota			Pca (PRACTICAL)
								Beta	SE	P-value	Beta	SE	P-value
class	Alphaproteobacteria id.2379	rs140912403	C	T	0.06461	0.00312054	44.7759	-0.160677	0.0317708	6.2e-07	0.029	0.0174	0.0959599
		rs34569731	G	A	0.335	0.00221541	31.7595	-0.0705145	0.0157564	7.38e-06	0.0189	0.0103	0.0659994
		rs55876211	C	T	0.172	0.00186007	26.6561	-0.080811	0.0184159	7.54e-06	0.0248	0.0105	0.0176901
		rs62285697	C	T	0.1998	0.00207344	29.7201	0.0805256	0.0180912	9.76e-06	-0.0066	0.0111	0.5479
		rs76784716	A	G	0.07157	0.00236038	33.8427	0.133271	0.0267738	5.09e-07	-0.0451	0.0154	0.00340298
		rs7960664	A	G	0.1511	0.00241122	34.5734	-0.0969489	0.0215149	8.84e-06	-0.0094	0.013	0.4697
		rs9813022	A	G	0.3022	0.00238043	34.1309	-0.0751277	0.0153867	1.05e-06	0.0101	0.0087	0.2428
family	Porphyromonadaceae id.943	rs10858364	G	T	0.2763	0.00122369	17.5251	0.055316	0.012085	4.31062e-06	0.0015	0.011	0.8903
		rs17065783	A	G	0.2237	0.00121447	17.3928	-0.059133	0.0122235	1.79349e-06	-0.0107	0.0095	0.263
		rs1980561	A	G	0.3857	0.00111599	15.981	-0.0485289	0.0109284	8.9454e-06	0.0098	0.0083	0.2353
		rs35233670	T	C	0.4414	0.00110597	15.8373	-0.0473576	0.010602	7.90988e-06	-0.0032	0.0081	0.693499
		rs35961441	A	C	0.07356	0.00114176	16.3504	0.0915257	0.0207306	8.37394e-06	0.0003	0.0157	0.9853
		rs6953849	A	G	0.1471	0.00129411	18.5349	0.0718149	0.0150724	2.44478e-06	0.0305	0.0113	0.00702506
		rs7330827	T	C	0.07555	0.00150624	21.5777	-0.103842	0.0237355	8.04896e-06	-0.0276	0.0172	0.1088
		rs864093	A	C	0.2565	0.00106308	15.2225	-0.0527939	0.0117499	9.59798e-06	-0.0125	0.0091	0.169
genus	Adlercreutzia id.812	rs11604400	C	T	0.1153	0.0021444	30.7395	-0.102524	0.0234834	9.74473e-06	0.0063	0.0133	0.6342
		rs13231526	C	A	0.06362	0.00244448	35.0515	0.143237	0.0311654	4.8136e-06	-0.0242	0.0158	0.1249
		rs2717140	C	T	0.1113	0.002812	40.3362	-0.119225	0.0251081	2.04593e-06	0.022	0.0141	0.1174
		rs55719207	G	A	0.4175	0.00237815	34.0981	-0.0699243	0.0158036	9.60506e-06	0.0091	0.0092	0.3187
		rs6664405	T	C	0.1441	0.00224068	32.1226	-0.0953084	0.0210752	5.2342e-06	-0.0064	0.0118	0.589
		rs7680684	T	C	0.325	0.00305036	43.7659	0.083381	0.0168901	9.769e-07	0.0016	0.009	0.8638
		rs9490822	C	T	0.4473	0.00266757	38.259	-0.0734512	0.0155789	2.54419e-06	0.0192	0.0081	0.0180098
		rs9915817	C	T	0.329	0.00247837	35.5387	-0.0749219	0.016833	8.21675e-06	0.0143	0.009	0.1141
genus	Eubacterium fissicatena group id.14373	rs10147907	T	G	0.06859	0.00379154	54.4406	0.172263	0.039601	8.27237e-06	0.0401	0.0159	0.0116899
		rs11818408	G	A	0.4771	0.00559036	80.4141	0.10585	0.0237114	8.20012e-06	0.0066	0.0082	0.4236
		rs11876297	T	C	0.2157	0.00584802	84.1422	0.131469	0.0281712	2.66557e-06	-0.0079	0.0109	0.4727
		rs151257695	A	G	0.08052	0.00649958	93.5783	0.20951	0.0454847	3.09678e-06	0.0372	0.0169	0.0279698
		rs1768152	C	T	0.1372	0.00460653	66.1968	-0.139489	0.0316186	8.70062e-06	0.0015	0.0122	0.9049
		rs2733072	G	A	0.4652	0.00598179	86.0784	0.109644	0.0228306	1.49091e-06	0.0249	0.0086	0.00376704
		rs3771393	T	C	0.2843	0.00696678	100.352	-0.130842	0.0266671	7.37904e-07	0.0045	0.0093	0.6297
		rs6934739	A	G	0.2952	0.0051698	74.3331	0.111463	0.0252788	9.75326e-06	0.0016	0.0092	0.8592
		rs7104872	G	A	0.1779	0.00561995	80.8421	0.138612	0.0291906	2.73149e-06	0.0118	0.0106	0.2694
genus	genus Eubacterium hallii group id.11338	rs10501370	C	T	0.05268	0.00133354	19.1004	-0.115589	0.0252489	5.41914e-06	0.0212	0.0175	0.225
		rs10798999	C	T	0.2157	0.0012248	17.5411	0.0601661	0.0126752	2.60555e-06	-0.0081	0.0096	0.399
		rs10808115	C	A	0.4781	0.0012714	18.2093	0.0504747	0.0109922	4.42446e-06	-0.0136	0.0083	0.1005
		rs117748144	T	C	0.04274	0.00131111	18.7787	-0.126582	0.028712	7.85995e-06	0.0121	0.0178	0.4983
		rs13116360	T	C	0.06262	0.00278868	40.0009	0.154124	0.0297185	2.9449e-07	0.0353	0.0199	0.0761904
		rs138531890	A	G	0.05368	0.00238257	34.1617	0.153138	0.0349456	5.43063e-06	0.0087	0.0199	0.663901
		rs17074066	T	C	0.09145	0.00110102	15.7664	-0.0813986	0.0189272	9.3491e-06	0.0143	0.0154	0.3522
		rs17474256	G	A	0.1233	0.00142127	20.3588	0.0810805	0.0184573	9.45453e-06	-0.0136	0.0137	0.3204
		rs281379	A	G	0.4602	0.00123971	17.7548	-0.0499523	0.0112153	9.32803e-06	0.0068	0.0083	0.4091
		rs28584818	A	G	0.06859	0.00203219	29.1277	0.126115	0.0268627	4.43231e-06	-0.016	0.0185	0.3871
		rs60254196	G	A	0.4592	0.00135767	19.4465	0.0522832	0.0111865	2.69675e-06	-0.0064	0.0084	0.4413
		rs630939	C	T	0.3996	0.00124275	17.7985	-0.0508914	0.0114352	9.15756e-06	0.0088	0.009	0.3237
		rs74018587	C	T	0.03678	0.00309331	44.3839	0.208943	0.043822	3.70254e-06	-0.0275	0.0225	0.2218
		rs78056098	G	T	0.3608	0.00118755	17.007	-0.0507411	0.0113758	8.2882e-06	0.0012	0.0083	0.8826
		rs949971	T	G	0.3837	0.00137996	19.7662	-0.0540164	0.0116101	3.29003e-06	-0.0058	0.0085	0.4952
genus	genus Odoribacter id.952	rs10093869	A	G	0.3757	0.00156607	22.4362	-0.0577795	0.0125389	3.67443e-06	-0.0005	0.0085	0.9525
		rs10423795	T	C	0.4066	0.00146341	20.9634	-0.0550695	0.0121164	6.5793e-06	-0.0004	0.009	0.9676
		rs28417404	A	G	0.169	0.0014841	21.2601	-0.0726896	0.0161372	3.68036e-06	-0.0406	0.011	0.0002246
		rs4793970	A	G	0.3012	0.00139823	20.0283	-0.0576329	0.0129154	6.02698e-06	-0.0139	0.0087	0.1102
		rs6856150	A	G	0.1183	0.00162254	23.2466	-0.0881922	0.0194146	6.05954e-06	-0.0122	0.0142	0.3887
		rs74553962	T	G	0.06262	0.0017316	24.8117	0.121449	0.0264106	9.48681e-06	0.0219	0.0175	0.2122
		rs77779484	G	A	0.05865	0.00196761	28.2002	-0.133489	0.0268526	6.56251e-07	-0.0008	0.0177	0.9629
genus	Roseburia id.2012	rs12740451	T	C	0.1252	0.00106577	15.2611	0.0697527	0.0153607	7.3426e-06	-0.0129	0.0121	0.2888
		rs16910295	T	C	0.06064	0.00109511	15.6816	-0.0980434	0.020957	2.91112e-06	-0.0035	0.0164	0.8308
		rs2160994	C	T	0.3797	0.00142851	20.4626	-0.0550687	0.0112481	9.6984e-07	0.0301	0.0085	0.000432504
		rs2943022	T	C	0.4602	0.0012114	17.3489	0.0493786	0.0106763	4.11405e-06	-0.0035	0.0084	0.6742
		rs302266	T	C	0.1203	0.00127885	18.3162	-0.0777312	0.0172985	8.12587e-06	0.001	0.0128	0.9396
		rs329182	T	C	0.1571	0.00126209	18.0758	0.0690327	0.0152884	5.90147e-06	-0.0055	0.0123	0.6544
		rs55858165	A	C	0.07753	0.00459764	66.0684	0.179284	0.0404954	9.98964e-06	-0.0161	0.0202	0.4276
		rs57466170	C	T	0.08648	0.00086851	12.434	0.0741405	0.0171601	8.30099e-06	-0.0185	0.0142	0.1931
		rs6445851	A	G	0.4006	0.00118784	17.0111	0.0497336	0.0108158	3.5272e-06	0.0123	0.0083	0.1379
		rs6930661	C	T	0.07555	0.00129159	18.4988	-0.0961587	0.0204975	2.47942e-06	-0.0014	0.0157	0.9267
		rs75326254	C	T	0.06362	0.00130428	18.6808	-0.104628	0.0230897	7.50205e-06	0.0312	0.0169	0.064
		rs78753150	A	C	0.05865	0.00103625	14.8378	0.0968739	0.0214067	9.98321e-06	-0.0092	0.017	0.589
		rs9300744	C	T	0.2386	0.00125816	18.0194	-0.0588452	0.0126228	4.75116e-06	0.0118	0.0097	0.2249
genus	Holdemania id.2157	rs10885477	T	C	0.06163	0.00211225	30.2775	-0.135137	0.0301894	8.59825e-06	-0.0044	0.0169	0.795
		rs11080063	G	A	0.4662	0.0022026	31.5755	-0.0665238	0.0149837	6.66884e-06	0.0013	0.0083	0.8726
		rs111745969	A	G	0.07952	0.00213191	30.5601	0.120677	0.0265781	3.70775e-06	-0.0327	0.0145	0.0243602
		rs113593397	A	G	0.1024	0.00305601	43.8471	-0.128935	0.0282526	9.35729e-06	0.0126	0.0153	0.4101
		rs12701617	A	G	0.4583	0.0021669	31.0626	-0.0660617	0.0149427	9.51853e-06	0.0181	0.0086	0.0352801
		rs1867876	T	C	0.2942	0.00295071	42.3318	0.0842919	0.0162192	2.7388e-07	-0.0204	0.0096	0.0327597
		rs4146507	C	T	0.2217	0.00218045	31.2573	0.079488	0.0177002	7.2297e-06	-0.0165	0.01	0.0995108
		rs6133067	T	C	0.3111	0.00355598	51.0463	0.0910829	0.0178561	5.16928e-07	0.0096	0.0108	0.3709
		rs73139538	G	A	0.05268	0.00220381	31.593	-0.148594	0.0327469	7.77177e-06	-0.0191	0.0202	0.3429
		rs77293403	A	G	0.04573	0.00236336	33.8856	0.164556	0.0341775	1.77468e-06	-0.0336	0.0197	0.0887503
		rs80149660	C	T	0.05865	0.00599394	86.2543	-0.232987	0.0519183	6.04213e-06	0.0049	0.019	0.7949
		rs9500080	C	T	0.2346	0.0030845	44.2572	0.0926764	0.0178886	4.08517e-07	-0.0076	0.0101	0.4515
		rs9529719	C	T	0.325	0.00240506	34.485	-0.074038	0.0160494	5.96664e-06	0.0077	0.0089	0.3877
		rs967319	T	C	0.2465	0.00231039	33.1244	0.0788638	0.0176744	8.38147e-06	0.0063	0.0094	0.5017
genus	Flavonifractor id.2059	rs114873521	C	T	0.07654	0.0023915	34.2901	-0.130067	0.0294087	7.12525e-06	0.0317	0.02	0.1122
		rs11811696	T	C	0.1103	0.00264385	37.9179	-0.116063	0.0241012	2.07348e-06	0.0038	0.0146	0.7968
		rs12030302	G	A	0.4911	0.00239547	34.3471	0.0692276	0.0137467	5.60841e-07	-0.0008	0.008	0.9177
		rs34066017	A	G	0.2455	0.00216402	31.0213	0.0764294	0.0159789	1.52086e-06	-0.0122	0.0098	0.2109
		rs806808	C	T	0.4761	0.00222117	31.8424	-0.0667272	0.0136557	1.17972e-06	0.0291	0.0082	0.000389296
genus	Allisonella id.2174	rs1901739	G	T	0.495	0.00670056	96.4914	-0.115769	0.0248626	3.58798e-06	0.012	0.008	0.1361
		rs35110698	T	C	0.1491	0.00543257	78.132	-0.146322	0.0320852	5.72321e-06	-0.0128	0.0108	0.2377
		rs35778461	C	T	0.1918	0.00667012	96.05	0.146679	0.0297186	1.20629e-06	-0.018	0.01	0.0715007
		rs594561	T	C	0.4414	0.00621139	89.4031	-0.112231	0.0251681	9.41109e-06	0.0054	0.0081	0.5029
		rs602075	G	A	0.2306	0.0101317	146.407	-0.168974	0.0296976	3.56574e-08	0.0189	0.0091	0.0390598
		rs7898615	T	G	0.1153	0.0057557	82.8061	0.167966	0.0373586	8.87279e-06	-0.0094	0.013	0.4707
genus	Dorea id.1997	rs11150408	G	T	0.4453	0.00117769	16.8656	-0.0488254	0.0109063	7.05781e-06	-0.0109	0.0095	0.2517
		rs12537781	T	C	0.2296	0.00109142	15.6287	-0.055544	0.0125223	9.15145e-06	-0.0151	0.0099	0.127
		rs13279148	G	A	0.166	0.00141674	20.2939	0.0715309	0.0150878	2.25284e-06	0.0007	0.0111	0.9517
		rs1899291	T	C	0.1282	0.0010866	15.5597	-0.0697217	0.0150285	4.56688e-06	0.0022	0.0118	0.8522
		rs3005511	G	A	0.336	0.00118864	17.0225	-0.0516127	0.0112852	5.28701e-06	-0.0117	0.0087	0.1802
		rs3752849	G	A	0.0328	0.0017033	24.4056	0.163846	0.036608	7.68051e-06	0.0175	0.0201	0.3837
		rs4793307	C	T	0.2455	0.00122128	17.4905	0.0574165	0.0122472	4.00691e-06	0.0047	0.0093	0.616
		rs62503162	A	G	0.08748	0.00151489	21.7018	-0.0974091	0.0194379	7.46603e-07	0.0081	0.0156	0.6052
		rs73729431	C	T	0.06064	0.00215234	30.8535	-0.13745	0.0299983	3.16738e-06	-0.0395	0.0197	0.0446303
genus	Coprobacter id.949	rs11532348	C	T	0.1829	0.00322856	46.3309	-0.103931	0.0226826	5.71189e-06	0.0197	0.011	0.0740594
		rs12684609	T	C	0.1978	0.00322621	46.2971	0.100827	0.0220366	6.10183e-06	-0.007	0.0108	0.5166
		rs12996055	A	C	0.1918	0.00263443	37.7824	0.0921817	0.0209405	8.07644e-06	-0.0128	0.0096	0.1808
		rs143662916	C	T	0.05765	0.00696929	100.388	0.253264	0.0540141	3.07249e-06	-0.0152	0.019	0.4246
		rs189356	G	A	0.4781	0.00304493	43.6877	0.0781125	0.0171916	6.26297e-06	-0.0175	0.0089	0.0486396
		rs213863	T	C	0.3091	0.00336353	48.2742	0.0887412	0.0188377	2.34882e-06	-0.0001	0.0089	0.9882
		rs28402691	T	C	0.167	0.00340916	48.9314	0.110695	0.0251199	9.55675e-06	-0.0015	0.0124	0.9012
		rs305411	A	G	0.1352	0.00390453	56.0693	0.129218	0.0264518	1.00907e-06	-0.0048	0.0125	0.7011
		rs3828477	G	T	0.2813	0.0033644	48.2868	-0.0912179	0.019569	2.88975e-06	0.0102	0.0094	0.2778
		rs72821405	T	C	0.08847	0.00350256	50.2767	-0.147365	0.0319978	4.75762e-06	-0.0167	0.0166	0.3147
		rs74919520	G	A	0.1282	0.00353204	50.7014	0.125703	0.0276296	5.76328e-06	-0.0202	0.0124	0.1026
order	Rhodospirillales id.2667	rs1035406	G	A	0.0994	0.00235648	33.7868	-0.114725	0.0247994	4.07165e-06	0.0007	0.0129	0.9584
		rs11591293	G	T	0.4195	0.00254417	36.4847	0.0722755	0.0158186	4.68533e-06	0.0079	0.0082	0.3346
		rs11630875	T	C	0.1819	0.00265898	38.1354	0.0945198	0.0202139	3.70382e-06	-0.011	0.0108	0.3088
		rs13336560	C	T	0.4563	0.00239884	34.3955	-0.0695313	0.0157065	9.74675e-06	0.0019	0.0099	0.8461
		rs1549633	A	C	0.1561	0.00261748	37.5387	0.0996735	0.0216667	3.88025e-06	-0.0205	0.0125	0.1001
		rs3730086	A	G	0.2386	0.00232743	33.3693	0.0800354	0.0178737	7.98252e-06	-0.0013	0.0094	0.8929
		rs3754624	C	T	0.162	0.00240562	34.4929	0.094128	0.0198389	2.68368e-06	0.0034	0.0108	0.7501
		rs4278423	T	C	0.1064	0.00210509	30.1747	0.105215	0.0233778	3.98043e-06	-0.0083	0.0125	0.5095
		rs55876211	C	T	0.172	0.00213119	30.5497	-0.0865002	0.0195197	7.87318e-06	0.0248	0.0105	0.0176901
		rs61933850	G	A	0.09046	0.0044617	64.1062	0.164663	0.0360285	6.99874e-06	-0.0268	0.018	0.1364
		rs7001029	C	T	0.09344	0.00246923	35.4073	0.120726	0.0260989	2.83067e-06	0.0056	0.0151	0.7114
		rs76784716	A	G	0.07157	0.00245944	35.2666	0.136039	0.0284399	1.31383e-06	-0.0451	0.0154	0.00340298
		rs77304857	C	A	0.1123	0.00198355	28.4291	-0.0997433	0.0222165	6.02033e-06	0.0116	0.0117	0.3206
		rs9813022	A	G	0.3022	0.002911	41.7605	-0.0830794	0.0162642	3.07213e-07	0.0101	0.0087	0.2428
SNP, single-nucleotide polymorphism; EA, effect allele; OA, other allele; R2, percentage of the variation of asthma explained by the SNP; Beta, estimate of the effect of the association; SE. standard error;

## Sheet: Table S2
Table S2. SNPs used as instrumental variables from gut microbiome and Pca GWASs (P < 1 × 10-5) in FinnGen.
Classification	Bacterial traits	SNP	EA	OA	EAF	R2 (%)	F	gut microbiota			Pca (FinnGen)
								Beta	SE	P-value	Beta	SE	P-value
class	Alphaproteobacteria id.2379	rs140912403	C	T	0.06461	0.00312054	44.7759	-0.160677	0.0317708	6.20369e-07	-0.0217603	0.0304061	0.474204
		rs34569731	G	A	0.335	0.00221541	31.7595	-0.0705145	0.0157564	7.37921e-06	-0.00319384	0.0147029	0.828033
		rs62285697	C	T	0.1998	0.00207344	29.7201	0.0805256	0.0180912	9.75933e-06	-0.0194697	0.0164736	0.237256
		rs76784716	A	G	0.07157	0.00236038	33.8427	0.133271	0.0267738	5.09143e-07	0.00197518	0.0225673	0.930255
		rs7960664	A	G	0.1511	0.00241122	34.5734	-0.0969489	0.0215149	8.84301e-06	-0.000751447	0.025023	0.976043
		rs9813022	A	G	0.3022	0.00238043	34.1309	-0.0751277	0.0153867	1.05334e-06	-0.0160382	0.0146079	0.272245
family	family Porphyromonadaceae id.943	rs10762312	A	G	0.2614	0.00105895	15.1633	0.052368	0.0118814	8.7e-06	-0.00148209	0.0152805	0.922732
		rs10858364	G	T	0.2763	0.00122369	17.5251	0.055316	0.012085	4.31e-06	-2.57e-05	0.0165467	0.998761
		rs17065783	A	G	0.2237	0.00121447	17.3928	-0.059133	0.0122235	1.79e-06	0.0129746	0.0191073	0.497113
		rs1980561	A	G	0.3857	0.00111599	15.981	-0.0485289	0.0109284	8.95e-06	0.0099222	0.0141224	0.482315
		rs35233670	T	C	0.4414	0.00110597	15.8373	-0.0473576	0.010602	7.91e-06	-0.00571964	0.0141105	0.685222
		rs35961441	A	C	0.07356	0.00114176	16.3504	0.0915257	0.0207306	8.37e-06	-0.00313766	0.0360392	0.930622
		rs6953849	A	G	0.1471	0.00129411	18.5349	0.0718149	0.0150724	2.44e-06	-0.00717118	0.0182952	0.69508
		rs7330827	T	C	0.07555	0.00150624	21.5777	-0.103842	0.0237355	8.05e-06	0.00017367	0.0302397	0.995418
		rs864093	A	C	0.2565	0.00106308	15.2225	-0.0527939	0.0117499	9.6e-06	-0.00934066	0.0171567	0.586144
genus	Adlercreutzia id.812	rs11604400	C	T	0.1153	0.0021444	30.7395	-0.102524	0.0234834	9.74473e-06	-0.0157412	0.0229646	0.493057
		rs13231526	C	A	0.06362	0.00244448	35.0515	0.143237	0.0311654	4.8136e-06	-0.0382231	0.0259905	0.141384
		rs2717140	C	T	0.1113	0.002812	40.3362	-0.119225	0.0251081	2.04593e-06	0.0162686	0.0237761	0.493823
		rs55719207	G	A	0.4175	0.00237815	34.0981	-0.0699243	0.0158036	9.60506e-06	-0.00306401	0.0144615	0.832205
		rs6664405	T	C	0.1441	0.00224068	32.1226	-0.0953084	0.0210752	5.2342e-06	-0.011075	0.0198699	0.577273
		rs7680684	T	C	0.325	0.00305036	43.7659	0.083381	0.0168901	9.769e-07	-0.0121112	0.0149074	0.416544
		rs9490822	C	T	0.4473	0.00266757	38.259	-0.0734512	0.0155789	2.54419e-06	0.0267791	0.0141606	0.0586111
		rs9915817	C	T	0.329	0.00247837	35.5387	-0.0749219	0.016833	8.21675e-06	0.0037787	0.0157156	0.809987
genus	Eubacterium fissicatena group id.14373	rs10147907	T	G	0.06859	0.00379154	54.4406	0.172263	0.039601	8.27237e-06	-0.0169585	0.0269209	0.528735
		rs11818408	G	A	0.4771	0.00559036	80.4141	0.10585	0.0237114	8.20012e-06	0.00948	0.0144524	0.51186
		rs11876297	T	C	0.2157	0.00584802	84.1422	0.131469	0.0281712	2.66557e-06	0.00765139	0.0160214	0.632955
		rs151257695	A	G	0.08052	0.00649958	93.5783	0.20951	0.0454847	3.09678e-06	0.0200708	0.0270799	0.458591
		rs1768152	C	T	0.1372	0.00460653	66.1968	-0.139489	0.0316186	8.70062e-06	-0.0121588	0.0229858	0.596826
		rs2733072	G	A	0.4652	0.00598179	86.0784	0.109644	0.0228306	1.49091e-06	-0.0126284	0.0141113	0.370834
		rs3771393	T	C	0.2843	0.00696678	100.352	-0.130842	0.0266671	7.37904e-07	-0.0379051	0.0178317	0.0335274
		rs6934739	A	G	0.2952	0.0051698	74.3331	0.111463	0.0252788	9.75326e-06	0.0178177	0.0150202	0.235524
		rs7104872	G	A	0.1779	0.00561995	80.8421	0.138612	0.0291906	2.73149e-06	0.00940339	0.0220834	0.670244
genus	genus Eubacterium hallii group id.11338	rs10501370	C	T	0.05268	0.00133354	19.1004	-0.115589	0.0252489	5.41914e-06	0.0152053	0.0290189	0.600293
		rs10798999	C	T	0.2157	0.0012248	17.5411	0.0601661	0.0126752	2.60555e-06	-0.00792442	0.0159899	0.620185
		rs117748144	T	C	0.04274	0.00131111	18.7787	-0.126582	0.028712	7.85995e-06	0.0447575	0.0317889	0.159143
		rs13116360	T	C	0.06262	0.00278868	40.0009	0.154124	0.0297185	2.9449e-07	0.0241988	0.0285542	0.396734
		rs17074066	T	C	0.09145	0.00110102	15.7664	-0.0813986	0.0189272	9.3491e-06	-0.0665243	0.0483132	0.168531
		rs17474256	G	A	0.1233	0.00142127	20.3588	0.0810805	0.0184573	9.45453e-06	0.0241309	0.023872	0.312089
		rs281379	A	G	0.4602	0.00123971	17.7548	-0.0499523	0.0112153	9.32803e-06	-0.0344509	0.01433	0.0162118
		rs28584818	A	G	0.06859	0.00203219	29.1277	0.126115	0.0268627	4.43231e-06	-0.00322692	0.0262258	0.902073
		rs60254196	G	A	0.4592	0.00135767	19.4465	0.0522832	0.0111865	2.69675e-06	-0.00110686	0.014222	0.937965
		rs630939	C	T	0.3996	0.00124275	17.7985	-0.0508914	0.0114352	9.15756e-06	-0.00520447	0.0142883	0.715674
		rs6550770	C	T	0.0517	0.0038475	55.2471	0.198087	0.0443545	4.82303e-06	0.0278579	0.0353402	0.430534
		rs74018587	C	T	0.03678	0.00309331	44.3839	0.208943	0.043822	3.70254e-06	0.054306	0.0364386	0.136135
		rs78056098	G	T	0.3608	0.00118755	17.007	-0.0507411	0.0113758	8.2882e-06	-0.0177892	0.0147271	0.227076
		rs949971	T	G	0.3837	0.00137996	19.7662	-0.0540164	0.0116101	3.29003e-06	0.00492539	0.0149852	0.742395
genus	genus Odoribacter id.952	rs10093869	A	G	0.3757	0.00156607	22.4362	-0.0577795	0.0125389	3.67443e-06	-0.00279301	0.0142665	0.844788
		rs10423795	T	C	0.4066	0.00146341	20.9634	-0.0550695	0.0121164	6.5793e-06	0.0127928	0.0145325	0.378703
		rs28417404	A	G	0.169	0.0014841	21.2601	-0.0726896	0.0161372	3.68036e-06	-0.0350173	0.0237817	0.1409
		rs4793970	A	G	0.3012	0.00139823	20.0283	-0.0576329	0.0129154	6.02698e-06	-0.0174068	0.0147089	0.236643
		rs6856150	A	G	0.1183	0.00162254	23.2466	-0.0881922	0.0194146	6.05954e-06	-0.00554688	0.0214164	0.795634
		rs74553962	T	G	0.06262	0.0017316	24.8117	0.121449	0.0264106	9.48681e-06	0.0169214	0.0267231	0.526594
		rs77779484	G	A	0.05865	0.00196761	28.2002	-0.133489	0.0268526	6.56251e-07	0.00326731	0.0298057	0.91271
genus	Roseburia id.2012	rs16910295	T	C	0.06064	0.00109511	15.6816	-0.0980434	0.020957	2.91112e-06	0.00474766	0.0311838	0.878992
		rs2160994	C	T	0.3797	0.00142851	20.4626	-0.0550687	0.0112481	9.6984e-07	-0.000485026	0.0149656	0.974146
		rs2943022	T	C	0.4602	0.0012114	17.3489	0.0493786	0.0106763	4.11405e-06	-0.0124172	0.0143192	0.38585
		rs329182	T	C	0.1571	0.00126209	18.0758	0.0690327	0.0152884	5.90147e-06	-0.00192876	0.0193736	0.920697
		rs55858165	A	C	0.07753	0.00459764	66.0684	0.179284	0.0404954	9.98964e-06	0.0433353	0.0371757	0.24374
		rs57466170	C	T	0.08648	0.00086851	12.434	0.0741405	0.0171601	8.30099e-06	-0.00815823	0.0265527	0.758656
		rs6930661	C	T	0.07555	0.00129159	18.4988	-0.0961587	0.0204975	2.47942e-06	-0.0156967	0.0300632	0.601584
		rs78753150	A	C	0.05865	0.00103625	14.8378	0.0968739	0.0214067	9.98321e-06	-0.0220075	0.0238241	0.355616
		rs9300744	C	T	0.2386	0.00125816	18.0194	-0.0588452	0.0126228	4.75116e-06	0.0203341	0.0184101	0.269374
genus	Holdemania id.2157	rs10885477	T	C	0.06163	0.00211225	30.2775	-0.135137	0.0301894	8.59825e-06	0.000124392	0.0319265	0.996891
		rs11080063	G	A	0.4662	0.0022026	31.5755	-0.0665238	0.0149837	6.66884e-06	0.00827903	0.0143196	0.563156
		rs111745969	A	G	0.07952	0.00213191	30.5601	0.120677	0.0265781	3.70775e-06	0.0201841	0.0208398	0.332776
		rs113593397	A	G	0.1024	0.00305601	43.8471	-0.128935	0.0282526	9.35729e-06	0.00518347	0.0236984	0.826863
		rs116500994	G	T	0.05169	0.00185485	26.581	-0.13755	0.0293386	2.34477e-06	0.0682509	0.0338062	0.0434991
		rs12701617	A	G	0.4583	0.0021669	31.0626	-0.0660617	0.0149427	9.51853e-06	-0.0078184	0.0141589	0.580818
		rs1867876	T	C	0.2942	0.00295071	42.3318	0.0842919	0.0162192	2.7388e-07	-0.0379753	0.0153877	0.0135906
		rs4146507	C	T	0.2217	0.00218045	31.2573	0.079488	0.0177002	7.2297e-06	-0.000178875	0.0164915	0.991346
		rs73139538	G	A	0.05268	0.00220381	31.593	-0.148594	0.0327469	7.77177e-06	0.0452895	0.0419367	0.280165
		rs77293403	A	G	0.04573	0.00236336	33.8856	0.164556	0.0341775	1.77468e-06	-0.00587174	0.0372575	0.874773
		rs80149660	C	T	0.05865	0.00599394	86.2543	-0.232987	0.0519183	6.04213e-06	0.02509	0.0344397	0.466296
		rs9500080	C	T	0.2346	0.0030845	44.2572	0.0926764	0.0178886	4.08517e-07	0.0128854	0.0185207	0.486597
		rs9529719	C	T	0.325	0.00240506	34.485	-0.074038	0.0160494	5.96664e-06	-0.000710406	0.0150807	0.962428
		rs967319	T	C	0.2465	0.00231039	33.1244	0.0788638	0.0176744	8.38147e-06	-0.0254788	0.0165903	0.124597
genus	Flavonifractor id.2059	rs114873521	C	T	0.07654	0.0023915	34.2901	-0.130067	0.0294087	7.12525e-06	0.0233226	0.0275009	0.396401
		rs11811696	T	C	0.1103	0.00264385	37.9179	-0.116063	0.0241012	2.07348e-06	0.0189778	0.0259145	0.463971
		rs12030302	G	A	0.4911	0.00239547	34.3471	0.0692276	0.0137467	5.60841e-07	0.025188	0.0141373	0.0748032
		rs34066017	A	G	0.2455	0.00216402	31.0213	0.0764294	0.0159789	1.52086e-06	-0.0209462	0.0174978	0.231277
		rs806808	C	T	0.4761	0.00222117	31.8424	-0.0667272	0.0136557	1.17972e-06	0.0294827	0.014273	0.0388642
genus	Allisonella id.2174	rs1901739	G	T	0.495	0.00670056	96.4914	-0.115769	0.0248626	3.58798e-06	0.000217498	0.0141332	0.987722
		rs35110698	T	C	0.1491	0.00543257	78.132	-0.146322	0.0320852	5.72321e-06	0.00897619	0.0199332	0.652484
		rs35778461	C	T	0.1918	0.00667012	96.05	0.146679	0.0297186	1.20629e-06	0.0243667	0.0167671	0.146156
		rs594561	T	C	0.4414	0.00621139	89.4031	-0.112231	0.0251681	9.41109e-06	0.0166189	0.0140752	0.237712
		rs602075	G	A	0.2306	0.0101317	146.407	-0.168974	0.0296976	3.56574e-08	0.0226991	0.0160367	0.156938
		rs6742198	A	G	0.1958	0.00700592	100.92	-0.149152	0.0316484	3.34511e-06	0.00537584	0.0165726	0.74565
		rs76904847	G	A	0.1899	0.00678705	97.7454	0.148523	0.0334857	6.08751e-06	0.00582337	0.0185967	0.754175
		rs7898615	T	G	0.1153	0.0057557	82.8061	0.167966	0.0373586	8.87279e-06	-0.0451108	0.0208281	0.0303215
genus	Dorea id.1997	rs11150408	G	T	0.4453	0.00117769	16.8656	-0.0488254	0.0109063	7.05781e-06	0.0229203	0.0142079	0.106699
		rs12537781	T	C	0.2296	0.00109142	15.6287	-0.055544	0.0125223	9.15145e-06	0.00699402	0.0164461	0.670641
		rs1899291	T	C	0.1282	0.0010866	15.5597	-0.0697217	0.0150285	4.56688e-06	0.0167708	0.0194398	0.388299
		rs3005511	G	A	0.336	0.00118864	17.0225	-0.0516127	0.0112852	5.28701e-06	-0.0172211	0.0152978	0.260284
		rs345219	G	T	0.3757	0.00116043	16.6181	0.0497368	0.0112621	8.80055e-06	0.00805526	0.0142619	0.572204
		rs3752849	G	A	0.0328	0.0017033	24.4056	0.163846	0.036608	7.68051e-06	-0.048575	0.0322989	0.132602
		rs62503162	A	G	0.08748	0.00151489	21.7018	-0.0974091	0.0194379	7.46603e-07	0.00480856	0.0342083	0.888212
genus	Coprobacter id.949	rs12684609	T	C	0.1978	0.00322621	46.2971	0.100827	0.0220366	6.10183e-06	0.0139922	0.0177848	0.431427
		rs12996055	A	C	0.1918	0.00263443	37.7824	0.0921817	0.0209405	8.07644e-06	0.00711102	0.0161065	0.658851			0.00322621
		rs213863	T	C	0.3091	0.00336353	48.2742	0.0887412	0.0188377	2.34882e-06	-0.0134447	0.0147196	0.361038			0.00263443
		rs28402691	T	C	0.167	0.00340916	48.9314	0.110695	0.0251199	9.55675e-06	-0.00565242	0.0198094	0.775383			0.00336353
		rs3828477	G	T	0.2813	0.0033644	48.2868	-0.0912179	0.019569	2.88975e-06	-0.013405	0.014932	0.369324			0.00340916
		rs72821405	T	C	0.08847	0.00350256	50.2767	-0.147365	0.0319978	4.75762e-06	-0.0121345	0.0253166	0.631719			0.0033644
		rs74919520	G	A	0.1282	0.00353204	50.7014	0.125703	0.0276296	5.76328e-06	0.0149107	0.0228407	0.513878			0.00350256
order	Rhodospirillales id.2667	rs1035406	G	A	0.0994	0.00235648	33.7868	-0.114725	0.0247994	4.07165e-06	0.00400874	0.022117	0.85617			0.00353204
		rs11591293	G	T	0.4195	0.00254417	36.4847	0.0722755	0.0158186	4.68533e-06	-0.00336909	0.0142936	0.813661			0.0230323
		rs11630875	T	C	0.1819	0.00265898	38.1354	0.0945198	0.0202139	3.70382e-06	0.00453786	0.021096	0.829685
		rs13336560	C	T	0.4563	0.00239884	34.3955	-0.0695313	0.0157065	9.74675e-06	-0.00666373	0.0143889	0.64328		0.00353204
		rs1549633	A	C	0.1561	0.00261748	37.5387	0.0996735	0.0216667	3.88025e-06	-0.018076	0.0221286	0.414008		0.00235648
		rs3730086	A	G	0.2386	0.00232743	33.3693	0.0800354	0.0178737	7.98252e-06	0.0174289	0.016138	0.280146		0.00254417
		rs3754624	C	T	0.162	0.00240562	34.4929	0.094128	0.0198389	2.68368e-06	0.00949765	0.0184951	0.607586		0.00265898
		rs4278423	T	C	0.1064	0.00210509	30.1747	0.105215	0.0233778	3.98043e-06	-0.021184	0.0288906	0.463407		0.00239884
		rs61933850	G	A	0.09046	0.0044617	64.1062	0.164663	0.0360285	6.99874e-06	0.0139632	0.0209926	0.505956		0.00261748
		rs7001029	C	T	0.09344	0.00246923	35.4073	0.120726	0.0260989	2.83067e-06	-0.0255972	0.0243442	0.293041		0.00232743
		rs76784716	A	G	0.07157	0.00245944	35.2666	0.136039	0.0284399	1.31383e-06	0.00197518	0.0225673	0.930255		0.00240562
		rs77304857	C	A	0.1123	0.00198355	28.4291	-0.0997433	0.0222165	6.02033e-06	-0.00563925	0.0179298	0.753128		0.00210509
		rs9813022	A	G	0.3022	0.002911	41.7605	-0.0830794	0.0162642	3.07213e-07	-0.0160382	0.0146079	0.272245		0.0044617
SNP, single-nucleotide polymorphism; EA, effect allele; OA, other allele; R2, percentage of the variation of asthma explained by the SNP; Beta, estimate of the effect of the association; SE. standard error;															0.00246923
															0.00245944
															0.00198355
															0.002911
															0.0372311

## Sheet: Table S3
Table S3. MR for genetically predicted gut microbiome and prostate cancer (PRACTICAL)
exposure	method	nsnp	b	se	pval
class Alphaproteobacteria	Inverse variance weighted	7	-0.179079	0.0549045	0.0011077
class Alphaproteobacteria	MR Egger	7	-0.241702	0.221518	0.324989
class Alphaproteobacteria	Weighted median	7	-0.169615	0.0692589	0.0143253
class Alphaproteobacteria	Simple median	7	-0.180486	0.0687178	0.00862715
class Alphaproteobacteria	Maximum likelihood	7	-0.187636	0.0506767	0.000213388
family Porphyromonadaceae	Inverse variance weighted	8	0.137331	0.0695029	0.0481651
family Porphyromonadaceae	MR Egger	8	0.457038	0.275695	0.14844
family Porphyromonadaceae	Weighted median	8	0.130235	0.0807875	0.106947
family Porphyromonadaceae	Simple median	8	0.12426	0.0832199	0.135399
family Porphyromonadaceae	Maximum likelihood	8	0.145559	0.0628275	0.0205147
genus Adlercreutzia	Inverse variance weighted	8	-0.11673	0.0417584	0.00518392
genus Adlercreutzia	MR Egger	8	-0.0722698	0.198282	0.728
genus Adlercreutzia	Weighted median	8	-0.147244	0.0564715	0.00912332
genus Adlercreutzia	Simple median	8	-0.149546	0.0566669	0.00831433
genus Adlercreutzia	Maximum likelihood	8	-0.122801	0.0436013	0.0048556
genus Allisonella	Inverse variance weighted	6	-0.0679942	0.0305226	0.0259028
genus Allisonella	MR Egger	6	-0.0936717	0.205372	0.671978
genus Allisonella	Weighted median	6	-0.0998236	0.0371977	0.00728352
genus Allisonella	Simple median	6	-0.0798092	0.0362831	0.0278337
genus Allisonella	Maximum likelihood	6	-0.0707385	0.0287574	0.0139001
genus Coprobacter	Inverse variance weighted	11	-0.0801532	0.030358	0.00828415
genus Coprobacter	MR Egger	11	0.0289466	0.104994	0.789006
genus Coprobacter	Weighted median	11	-0.0648344	0.0421552	0.12405
genus Coprobacter	Simple median	11	-0.0694258	0.0433348	0.109138
genus Coprobacter	Maximum likelihood	11	-0.0814462	0.0312316	0.00911221
genus Dorea	Inverse variance weighted	9	0.11804	0.0525762	0.0247608
genus Dorea	MR Egger	9	0.0757003	0.142567	0.611855
genus Dorea	Weighted median	9	0.10032	0.071802	0.162359
genus Dorea	Simple median	9	0.106808	0.0734101	0.145684
genus Dorea	Maximum likelihood	9	0.121183	0.0539848	0.0247836
genus Eubacterium fissicatena group	Inverse variance weighted	9	0.0729974	0.0365303	0.0456872
genus Eubacterium fissicatena group	MR Egger	9	0.213525	0.203015	0.327851
genus Eubacterium fissicatena group	Weighted median	9	0.043493	0.0393937	0.269568
genus Eubacterium fissicatena group	Simple median	9	0.0623524	0.0431862	0.148794
genus Eubacterium fissicatena group	Maximum likelihood	9	0.0785893	0.028549	0.00590897
genus Eubacterium hallii group	Inverse variance weighted	15	-0.0757639	0.0386326	0.0498627
genus Eubacterium hallii group	MR Egger	15	-0.00418391	0.0877434	0.962693
genus Eubacterium hallii group	Weighted median	15	-0.128444	0.0537613	0.0168871
genus Eubacterium hallii group	Simple median	15	-0.131615	0.0528578	0.012775
genus Eubacterium hallii group	Maximum likelihood	15	-0.0760399	0.039575	0.0546797
genus Flavonifractor	Inverse variance weighted	5	-0.168598	0.0806355	0.0365399
genus Flavonifractor	MR Egger	5	0.0126556	0.384853	0.975832
genus Flavonifractor	Weighted median	5	-0.0993091	0.0812608	0.221669
genus Flavonifractor	Simple median	5	-0.159624	0.0871883	0.0671301
genus Flavonifractor	Maximum likelihood	5	-0.181043	0.0618073	0.00339881
genus Holdemania	Inverse variance weighted	14	-0.0812596	0.0356175	0.0225219
genus Holdemania	MR Egger	14	-0.0103361	0.107101	0.92471
genus Holdemania	Weighted median	14	-0.0703336	0.0467532	0.132489
genus Holdemania	Simple median	14	-0.0898647	0.0440741	0.0414556
genus Holdemania	Maximum likelihood	14	-0.0843506	0.0324059	0.00924285
genus Odoribacter	Inverse variance weighted	7	0.158849	0.0747122	0.0334918
genus Odoribacter	MR Egger	7	0.126381	0.264546	0.652999
genus Odoribacter	Weighted median	7	0.0907083	0.0730899	0.214587
genus Odoribacter	Simple median	7	0.138334	0.0839958	0.0995749
genus Odoribacter	Maximum likelihood	7	0.169255	0.059967	0.00476565
genus Roseburia	Inverse variance weighted	13	-0.118957	0.0527569	0.0241456
genus Roseburia	MR Egger	13	-0.0879674	0.161282	0.596348
genus Roseburia	Weighted median	13	-0.0874794	0.0653224	0.180507
genus Roseburia	Simple median	13	-0.0898017	0.0640036	0.160595
genus Roseburia	Maximum likelihood	13	-0.117719	0.0466554	0.0116306
order Rhodospirillales	Inverse variance weighted	14	-0.092744	0.0339138	0.00624368
order Rhodospirillales	MR Egger	14	-0.319027	0.150386	0.0553982
order Rhodospirillales	Weighted median	14	-0.0941463	0.0446847	0.0351262
order Rhodospirillales	Simple median	14	-0.0975923	0.042538	0.0217767
order Rhodospirillales	Maximum likelihood	14	-0.0949058	0.0324861	0.00348436

## Sheet: Table S4
Table S4. MR for genetically predicted gut microbiome and prostate cancer (FinnGen)
exposure	method	nsnp	b	se	pval
class Alphaproteobacteria	Inverse variance weighted	6	0.035236	0.081337	0.664861
class Alphaproteobacteria	MR Egger	6	0.095714	0.285688	0.754435
class Alphaproteobacteria	Weighted median	6	0.03494	0.106976	0.743956
class Alphaproteobacteria	Simple median	6	0.030057	0.100696	0.765327
class Alphaproteobacteria	Maximum likelihood	6	0.036051	0.08238	0.661667
family Porphyromonadaceae	Inverse variance weighted	9	-0.03645	0.100662	0.717285
family Porphyromonadaceae	MR Egger	9	-0.09071	0.448373	0.845423
family Porphyromonadaceae	Weighted median	9	-0.02739	0.126643	0.828786
family Porphyromonadaceae	Simple median	9	-0.0283	0.12756	0.824417
family Porphyromonadaceae	Maximum likelihood	9	-0.03617	0.101065	0.720407
genus Adlercreutzia	Inverse variance weighted	8	-0.10001	0.070229	0.154426
genus Adlercreutzia	MR Egger	8	-0.1654	0.31484	0.618173
genus Adlercreutzia	Weighted median	8	-0.12388	0.092023	0.178254
genus Adlercreutzia	Simple median	8	-0.09344	0.091748	0.308448
genus Adlercreutzia	Maximum likelihood	8	-0.10309	0.071693	0.150449
genus Allisonella	Inverse variance weighted	8	-0.05659	0.046329	0.221885
genus Allisonella	MR Egger	8	-0.20603	0.333515	0.559444
genus Allisonella	Weighted median	8	-0.0491	0.056011	0.380715
genus Allisonella	Simple median	8	-0.04869	0.054276	0.369635
genus Allisonella	Maximum likelihood	8	-0.05911	0.042718	0.166408
genus Coprobacter	Inverse variance weighted (multiplicative random effects)	7	-0.03703	0.079402	0.640969
genus Coprobacter	MR Egger	7	0.059877	0.325328	0.858054
genus Coprobacter	Weighted median	7	0.078154	0.081842	0.339614
genus Coprobacter	Simple median	7	0.077141	0.084502	0.361296
genus Coprobacter	Maximum likelihood	7	-0.03804	0.055247	0.49107
genus Dorea	Inverse variance weighted (multiplicative random effects)	7	-0.11331	0.150862	0.452584
genus Dorea	MR Egger	7	-0.29581	0.439253	0.519651
genus Dorea	Weighted median	7	-0.14548	0.136538	0.286663
genus Dorea	Simple median	7	-0.08764	0.136456	0.520699
genus Dorea	Maximum likelihood	7	-0.11944	0.094862	0.208011
genus Eubacterium fissicatena group	Inverse variance weighted	9	0.072239	0.04626	0.118386
genus Eubacterium fissicatena group	MR Egger	9	0.07214	0.238842	0.771399
genus Eubacterium fissicatena group	Weighted median	9	0.087257	0.062386	0.161909
genus Eubacterium fissicatena group	Simple median	9	0.087167	0.064086	0.173785
genus Eubacterium fissicatena group	Maximum likelihood	9	0.075673	0.047204	0.108907
genus Eubacterium hallii group	Inverse variance weighted	14	0.106281	0.066431	0.10963
genus Eubacterium hallii group	MR Egger	14	0.0567	0.143128	0.69895
genus Eubacterium hallii group	Weighted median	14	0.128274	0.089045	0.149714
genus Eubacterium hallii group	Simple median	14	0.12145	0.08658	0.160689
genus Eubacterium hallii group	Maximum likelihood	14	0.110561	0.066084	0.094317
genus Flavonifractor	Inverse variance weighted	5	-0.12532	0.140235	0.371512
genus Flavonifractor	MR Egger	5	-0.27551	0.640431	0.696083
genus Flavonifractor	Weighted median	5	-0.17762	0.135285	0.189214
genus Flavonifractor	Simple median	5	-0.17931	0.140915	0.2032
genus Flavonifractor	Maximum likelihood	5	-0.13513	0.101168	0.181636
genus Holdemania	Inverse variance weighted	14	-0.08882	0.05526	0.107997
genus Holdemania	MR Egger	14	-0.10945	0.169156	0.529795
genus Holdemania	Weighted median	14	-0.03776	0.07834	0.629808
genus Holdemania	Simple median	14	-0.03794	0.074758	0.611778
genus Holdemania	Maximum likelihood	14	-0.08884	0.055652	0.110426
genus Odoribacter	Inverse variance weighted	7	0.08882	0.094019	0.34481
genus Odoribacter	MR Egger	7	0.097053	0.295211	0.755661
genus Odoribacter	Weighted median	7	0.059742	0.123322	0.628072
genus Odoribacter	Simple median	7	0.062895	0.122611	0.607973
genus Odoribacter	Maximum likelihood	7	0.090907	0.095503	0.341159
genus Roseburia	Inverse variance weighted (multiplicative random effects)	9	-0.04363	0.103753	0.67412
genus Roseburia	MR Egger	9	0.21684	0.314507	0.504818
genus Roseburia	Weighted median	9	-0.03545	0.12173	0.770864
genus Roseburia	Simple median	9	-0.04842	0.126877	0.702713
genus Roseburia	Maximum likelihood	9	-0.04434	0.081457	0.586173
order Rhodospirillales	Inverse variance weighted	13	0.030664	0.052292	0.557606
order Rhodospirillales	MR Egger	13	-0.06992	0.205593	0.740199
order Rhodospirillales	Weighted median	13	0.056271	0.07065	0.425755
order Rhodospirillales	Simple median	13	0.04801	0.071621	0.502649
order Rhodospirillales	Maximum likelihood	13	0.031	0.052701	0.556378

## Sheet: Table S5
Table S5. Random effect meta-analysis of MR for genetically predicted gut microbiome and prostate cancer
exposure	OR [95%Cl] PRACTICAL	OR [95%Cl] FinnGen	OR [95%Cl] Meta-analysis	Pval
class Alphaproteobacteria	0.836 [0.751, 0.931]	1.036 [0.883, 1.215]	0.923 [0.748, 1.138]	0.452
family Porphyromonadaceae	1.147 [1.001, 1.315]	0.964 [0.791, 1.174]	1.068 [0.903, 1.263]	0.444
genus Adlercreutzia	0.890 [0.820, 0.966]	0.905 [0.789, 1.039]	0.894 [0.833, 0.959]	0.002
genus Allisonella	0.934 [0.880, 0.992]	0.945 [0.863, 1.035]	0.937 [0.892, 0.985]	0.011
genus Coprobacter	0.923 [0.870, 0.980]	1.052 [0.925, 1.195]	0.973 [0.858, 1.102]	0.663
genus Dorea	1.125 [1.015, 1.247]	0.876 [0.716, 1.072]	1.009 [0.791, 1.286]	0.946
genus Eubacterium fissicatena group	1.076 [1.001, 1.156]	1.075 [0.982, 1.177]	1.076 [1.017, 1.138]	0.99
genus Eubacterium hallii group	1.112 [0.976, 1.267]	0.927 [0.859, 1.000]	1.007 [0.843, 1.203]	0.937
genus Flavonifractor	0.845 [0.721, 0.990]	0.882 [0.670, 1.161]	0.854 [0.744, 0.980]	0.024
genus Holdemania	0.922 [0.860, 0.989]	0.915 [0.821, 1.020]	0.920 [0.867, 0.976]	0.005
genus Odoribacter	1.172 [1.012, 1.357]	1.093 [0.909, 1.314]	1.141 [1.017, 1.279]	0.025
genus Roseburia	0.888 [0.801, 0.985]	0.961 [0.801, 1.152]	0.905 [0.828, 0.990]	0.03
order Rhodospirillales	0.911 [0.853, 0.973]	1.031 [0.931, 1.142]	0.963 [0.854, 1.086]	0.54

## Sheet: Table S6
Table S6. Results of MR Steiger direction test.
Data source	Bacterial traits	Outcome	SNP	rsq.exposure	rsq.outcome	steiger_dir*	steiger_pval
PRACTICAL	class Alphaproteobacteria id.2379	Pca	rs140912403	0.00178492	1.98e-05	TRUE	1.64e-05
PRACTICAL	class Alphaproteobacteria id.2379	Pca	rs34569731	0.00139823	2.4e-05	TRUE	0.000212363
PRACTICAL	class Alphaproteobacteria id.2379	Pca	rs55876211	0.00134435	3.98e-05	TRUE	0.000539084
PRACTICAL	class Alphaproteobacteria id.2379	Pca	rs62285697	0.00138317	2.52e-06	TRUE	4.95e-05
PRACTICAL	class Alphaproteobacteria id.2379	Pca	rs76784716	0.00172919	6.11e-05	TRUE	0.000118443
PRACTICAL	class Alphaproteobacteria id.2379	Pca	rs7960664	0.00141753	3.73e-06	TRUE	4.67e-05
PRACTICAL	class Alphaproteobacteria id.2379	Pca	rs9813022	0.00166391	9.61e-06	TRUE	1.73e-05
PRACTICAL	family Porphyromonadaceae id.943	Pca	rs10858364	0.00146256	1.32583e-07	TRUE	1.5773e-05
PRACTICAL	family Porphyromonadaceae id.943	Pca	rs17065783	0.00163343	9.04497e-06	TRUE	2.00515e-05
PRACTICAL	family Porphyromonadaceae id.943	Pca	rs1980561	0.00137668	9.93991e-06	TRUE	0.0001089
PRACTICAL	family Porphyromonadaceae id.943	Pca	rs35233670	0.00139297	1.11281e-06	TRUE	3.56767e-05
PRACTICAL	family Porphyromonadaceae id.943	Pca	rs35961441	0.00136086	2.60336e-09	TRUE	2.68284e-05
PRACTICAL	family Porphyromonadaceae id.943	Pca	rs6953849	0.00158459	5.19411e-05	TRUE	0.000202085
PRACTICAL	family Porphyromonadaceae id.943	Pca	rs7330827	0.00133632	1.83588e-05	TRUE	0.000234709
PRACTICAL	family Porphyromonadaceae id.943	Pca	rs864093	0.00140938	1.34531e-05	TRUE	0.00011285
PRACTICAL	genus Adlercreutzia id.812	Pca	rs11604400	0.00133074	1.59981e-06	TRUE	5.97686e-05
PRACTICAL	genus Adlercreutzia id.812	Pca	rs13231526	0.00147457	1.67263e-05	TRUE	9.19038e-05
PRACTICAL	genus Adlercreutzia id.812	Pca	rs2717140	0.00157386	1.73576e-05	TRUE	5.17858e-05
PRACTICAL	genus Adlercreutzia id.812	Pca	rs55719207	0.00136676	6.97582e-06	TRUE	9.12066e-05
PRACTICAL	genus Adlercreutzia id.812	Pca	rs6664405	0.00142771	2.09742e-06	TRUE	3.44597e-05
PRACTICAL	genus Adlercreutzia id.812	Pca	rs7680684	0.00170088	2.25344e-07	TRUE	3.36594e-06
PRACTICAL	genus Adlercreutzia id.812	Pca	rs9490822	0.00155164	4.00595e-05	TRUE	0.00016395
PRACTICAL	genus Adlercreutzia id.812	Pca	rs9915817	0.00138304	1.79999e-05	TRUE	0.00017302
PRACTICAL	genus Eubacterium fissicatena group id.14373	Pca	rs10147907	0.00132111	4.53488e-05	TRUE	0.00073674
PRACTICAL	genus Eubacterium fissicatena group id.14373	Pca	rs11818408	0.00139125	4.61901e-06	TRUE	6.16159e-05
PRACTICAL	genus Eubacterium fissicatena group id.14373	Pca	rs11876297	0.00152026	3.74533e-06	TRUE	2.40174e-05
PRACTICAL	genus Eubacterium fissicatena group id.14373	Pca	rs151257695	0.00148108	3.45453e-05	TRUE	0.000201601
PRACTICAL	genus Eubacterium fissicatena group id.14373	Pca	rs1768152	0.00135877	1.07784e-07	TRUE	3.1269e-05
PRACTICAL	genus Eubacterium fissicatena group id.14373	Pca	rs2733072	0.00160982	5.97677e-05	TRUE	0.000221871
PRACTICAL	genus Eubacterium fissicatena group id.14373	Pca	rs3771393	0.00168018	1.66936e-06	TRUE	6.03154e-06
PRACTICAL	genus Eubacterium fissicatena group id.14373	Pca	rs6934739	0.00135738	2.15653e-07	TRUE	3.37799e-05
PRACTICAL	genus Eubacterium fissicatena group id.14373	Pca	rs7104872	0.00157389	8.83567e-06	TRUE	2.87098e-05
PRACTICAL	genus Eubacterium hallii group id.11338	Pca	rs10501370	0.00146304	1.04636e-05	TRUE	6.57218e-05
PRACTICAL	genus Eubacterium hallii group id.11338	Pca	rs10798999	0.00157273	5.07594e-06	TRUE	2.01011e-05
PRACTICAL	genus Eubacterium hallii group id.11338	Pca	rs10808115	0.00147191	1.91427e-05	TRUE	0.000106824
PRACTICAL	genus Eubacterium hallii group id.11338	Pca	rs117748144	0.00135697	3.29473e-06	TRUE	6.55629e-05
PRACTICAL	genus Eubacterium hallii group id.11338	Pca	rs13116360	0.00187678	2.24349e-05	TRUE	1.08756e-05
PRACTICAL	genus Eubacterium hallii group id.11338	Pca	rs138531890	0.00134073	1.36277e-06	TRUE	5.3357e-05
PRACTICAL	genus Eubacterium hallii group id.11338	Pca	rs17074066	0.00129135	6.14779e-06	TRUE	0.000137133
PRACTICAL	genus Eubacterium hallii group id.11338	Pca	rs17474256	0.00134727	7.02627e-06	TRUE	0.000103774
PRACTICAL	genus Eubacterium hallii group id.11338	Pca	rs281379	0.00138494	4.78576e-06	TRUE	6.53836e-05
PRACTICAL	genus Eubacterium hallii group id.11338	Pca	rs28584818	0.00153854	5.33317e-06	TRUE	2.5777e-05
PRACTICAL	genus Eubacterium hallii group id.11338	Pca	rs60254196	0.00152481	4.13895e-06	TRUE	2.45174e-05
PRACTICAL	genus Eubacterium hallii group id.11338	Pca	rs630939	0.00138275	6.81661e-06	TRUE	8.11716e-05
PRACTICAL	genus Eubacterium hallii group id.11338	Pca	rs74018587	0.00158681	1.06509e-05	TRUE	3.0615e-05
PRACTICAL	genus Eubacterium hallii group id.11338	Pca	rs78056098	0.00138898	1.49038e-07	TRUE	2.62326e-05
PRACTICAL	genus Eubacterium hallii group id.11338	Pca	rs949971	0.001511	3.31977e-06	TRUE	2.40881e-05
PRACTICAL	genus Odoribacter id.952	Pca	rs10093869	0.00148227	2.46714e-08	TRUE	1.23968e-05
PRACTICAL	genus Odoribacter id.952	Pca	rs10423795	0.00144208	1.4084e-08	TRUE	1.59666e-05
PRACTICAL	genus Odoribacter id.952	Pca	rs28417404	0.0014165	9.71215e-05	TRUE	0.00154004
PRACTICAL	genus Odoribacter id.952	Pca	rs4793970	0.00139016	1.82001e-05	TRUE	0.000167432
PRACTICAL	genus Odoribacter id.952	Pca	rs6856150	0.00144052	5.26298e-06	TRUE	4.80896e-05
PRACTICAL	genus Odoribacter id.952	Pca	rs74553962	0.00147616	1.1166e-05	TRUE	6.37123e-05
PRACTICAL	genus Odoribacter id.952	Pca	rs77779484	0.00172469	1.45655e-08	TRUE	2.35509e-06
PRACTICAL	genus Odoribacter id.952	Pca	rs12740451	0.00143952	8.10394e-06	TRUE	6.32747e-05
PRACTICAL	genus Roseburia id.2012	Pca	rs16910295	0.00152777	3.24743e-07	TRUE	1.13158e-05
PRACTICAL	genus Roseburia id.2012	Pca	rs2160994	0.00167289	8.9402e-05	TRUE	0.000336976
PRACTICAL	genus Roseburia id.2012	Pca	rs2943022	0.00149324	1.23785e-06	TRUE	1.88701e-05
PRACTICAL	genus Roseburia id.2012	Pca	rs302266	0.00140963	4.35182e-08	TRUE	2.08461e-05
PRACTICAL	genus Roseburia id.2012	Pca	rs329182	0.00142334	1.42563e-06	TRUE	3.12502e-05
PRACTICAL	genus Roseburia id.2012	Pca	rs55858165	0.00136842	4.52937e-06	TRUE	7.07158e-05
PRACTICAL	genus Roseburia id.2012	Pca	rs57466170	0.00130331	1.21019e-05	TRUE	0.000200505
PRACTICAL	genus Roseburia id.2012	Pca	rs6445851	0.00147599	1.56581e-05	TRUE	8.55639e-05
PRACTICAL	genus Roseburia id.2012	Pca	rs6930661	0.00153621	5.66954e-08	TRUE	8.97623e-06
PRACTICAL	genus Roseburia id.2012	Pca	rs75326254	0.00143344	2.43006e-05	TRUE	0.000174167
PRACTICAL	genus Roseburia id.2012	Pca	rs78753150	0.00142967	2.08818e-06	TRUE	3.3965e-05
PRACTICAL	genus Roseburia id.2012	Pca	rs9300744	0.00151703	1.05513e-05	TRUE	4.71092e-05
PRACTICAL	genus Holdemania id.2157	Pca	rs10885477	0.00139886	4.83307e-07	TRUE	2.86669e-05
PRACTICAL	genus Holdemania id.2157	Pca	rs11080063	0.00137613	1.74913e-07	TRUE	2.90796e-05
PRACTICAL	genus Holdemania id.2157	Pca	rs111745969	0.00143919	3.62606e-05	TRUE	0.000274717
PRACTICAL	genus Holdemania id.2157	Pca	rs113593397	0.0014539	4.83556e-06	TRUE	4.2103e-05
PRACTICAL	genus Holdemania id.2157	Pca	rs12701617	0.00136455	3.15818e-05	TRUE	0.000356828
PRACTICAL	genus Holdemania id.2157	Pca	rs1867876	0.00188467	3.21955e-05	TRUE	1.68836e-05
PRACTICAL	genus Holdemania id.2157	Pca	rs4146507	0.00140792	1.94111e-05	TRUE	0.000160099
PRACTICAL	genus Holdemania id.2157	Pca	rs6133067	0.00181574	5.63357e-06	TRUE	4.49377e-06
PRACTICAL	genus Holdemania id.2157	Pca	rs73139538	0.00143741	6.37459e-06	TRUE	5.48917e-05
PRACTICAL	genus Holdemania id.2157	Pca	rs77293403	0.00161803	2.07409e-05	TRUE	4.77651e-05
PRACTICAL	genus Holdemania id.2157	Pca	rs80149660	0.0014059	4.74215e-07	TRUE	2.7254e-05
PRACTICAL	genus Holdemania id.2157	Pca	rs9500080	0.0018729	4.03714e-06	TRUE	2.54381e-06
PRACTICAL	genus Holdemania id.2157	Pca	rs9529719	0.00148555	5.33691e-06	TRUE	3.62671e-05
PRACTICAL	genus Holdemania id.2157	Pca	rs967319	0.00138997	3.20269e-06	TRUE	5.22029e-05
PRACTICAL	genus Flavonifractor id.2059	Pca	rs114873521	0.00136563	1.79119e-05	TRUE	0.000191596
PRACTICAL	genus Flavonifractor id.2059	Pca	rs11811696	0.00161864	4.83006e-07	TRUE	6.58009e-06
PRACTICAL	genus Flavonifractor id.2059	Pca	rs12030302	0.00176984	7.13002e-08	TRUE	1.88611e-06
PRACTICAL	genus Flavonifractor id.2059	Pca	rs34066017	0.00159689	1.10498e-05	TRUE	2.96202e-05
PRACTICAL	genus Flavonifractor id.2059	Pca	rs806808	0.00166646	8.97863e-05	TRUE	0.000351842
PRACTICAL	genus Allisonella id.2174	Pca	rs1901739	0.00151348	1.60423e-05	TRUE	6.9475e-05
PRACTICAL	genus Allisonella id.2174	Pca	rs35110698	0.00145185	1.00152e-05	TRUE	6.81849e-05
PRACTICAL	genus Allisonella id.2174	Pca	rs35778461	0.00170013	2.31007e-05	TRUE	3.28717e-05
PRACTICAL	genus Allisonella id.2174	Pca	rs594561	0.00138824	3.16889e-06	TRUE	5.25533e-05
PRACTICAL	genus Allisonella id.2174	Pca	rs602075	0.00225818	3.07552e-05	TRUE	1.7005e-06
PRACTICAL	genus Allisonella id.2174	Pca	rs7898615	0.00141121	3.72785e-06	TRUE	4.86891e-05
PRACTICAL	genus Dorea id.1997	Pca	rs11150408	0.00139917	9.38626e-06	TRUE	9.06123e-05
PRACTICAL	genus Dorea id.1997	Pca	rs12537781	0.00137357	1.6587e-05	TRUE	0.000169729
PRACTICAL	genus Dorea id.1997	Pca	rs13279148	0.0015689	2.83557e-08	TRUE	6.9324e-06
PRACTICAL	genus Dorea id.1997	Pca	rs1899291	0.00150243	2.4784e-07	TRUE	1.29209e-05
PRACTICAL	genus Dorea id.1997	Pca	rs3005511	0.00146017	1.28949e-05	TRUE	7.93336e-05
PRACTICAL	genus Dorea id.1997	Pca	rs3752849	0.00139847	5.40471e-06	TRUE	6.39984e-05
PRACTICAL	genus Dorea id.1997	Pca	rs4793307	0.00153418	1.82104e-06	TRUE	1.62592e-05
PRACTICAL	genus Dorea id.1997	Pca	rs62503162	0.00175259	1.92225e-06	TRUE	3.94479e-06
PRACTICAL	genus Dorea id.1997	Pca	rs73729431	0.00146555	2.86642e-05	TRUE	0.000174322
PRACTICAL	genus Coprobacter id.949	Pca	rs11532348	0.00146558	2.29e-05	TRUE	0.000134113
PRACTICAL	genus Coprobacter id.949	Pca	rs12684609	0.00146141	3e-06	TRUE	3.18e-05
PRACTICAL	genus Coprobacter id.949	Pca	rs12996055	0.00135291	1.27e-05	TRUE	0.000152638
PRACTICAL	genus Coprobacter id.949	Pca	rs143662916	0.00153465	4.56e-06	TRUE	2.42e-05
PRACTICAL	genus Coprobacter id.949	Pca	rs189356	0.0014412	2.76e-05	TRUE	0.000192283
PRACTICAL	genus Coprobacter id.949	Pca	rs213863	0.00154904	9e-10	TRUE	7.37e-06
PRACTICAL	genus Coprobacter id.949	Pca	rs28402691	0.00135573	1.04e-07	TRUE	3.18e-05
PRACTICAL	genus Coprobacter id.949	Pca	rs305411	0.00166554	1.05e-06	TRUE	5.75e-06
PRACTICAL	genus Coprobacter id.949	Pca	rs3828477	0.00151672	8.4e-06	TRUE	3.97e-05
PRACTICAL	genus Coprobacter id.949	Pca	rs72821405	0.00148063	7.22e-06	TRUE	4.51e-05
PRACTICAL	genus Coprobacter id.949	Pca	rs74919520	0.00144496	1.89e-05	TRUE	0.00012445
PRACTICAL	order Rhodospirillales id.2667	Pca	rs1035406	0.00149392	2.09946e-08	TRUE	1.13818e-05
PRACTICAL	order Rhodospirillales id.2667	Pca	rs11591293	0.00145732	6.61781e-06	TRUE	4.94562e-05
PRACTICAL	order Rhodospirillales id.2667	Pca	rs11630875	0.00152625	7.39649e-06	TRUE	3.42447e-05
PRACTICAL	order Rhodospirillales id.2667	Pca	rs13336560	0.0013682	2.6262e-07	TRUE	3.21601e-05
PRACTICAL	order Rhodospirillales id.2667	Pca	rs1549633	0.00147732	1.91765e-05	TRUE	0.00010354
PRACTICAL	order Rhodospirillales id.2667	Pca	rs3730086	0.00139981	1.36371e-07	TRUE	2.41728e-05
PRACTICAL	order Rhodospirillales id.2667	Pca	rs3754624	0.00157131	7.06644e-07	TRUE	9.75045e-06
PRACTICAL	order Rhodospirillales id.2667	Pca	rs4278423	0.00141409	3.14359e-06	TRUE	4.42339e-05
PRACTICAL	order Rhodospirillales id.2667	Pca	rs55876211	0.00137099	3.97739e-05	TRUE	0.000462156
PRACTICAL	order Rhodospirillales id.2667	Pca	rs61933850	0.00145817	1.58055e-05	TRUE	9.63521e-05
PRACTICAL	order Rhodospirillales id.2667	Pca	rs7001029	0.00149366	9.80647e-07	TRUE	1.76748e-05
PRACTICAL	order Rhodospirillales id.2667	Pca	rs76784716	0.00159705	6.11471e-05	TRUE	0.000247904
PRACTICAL	order Rhodospirillales id.2667	Pca	rs77304857	0.00140717	7.00861e-06	TRUE	7.06583e-05
PRACTICAL	order Rhodospirillales id.2667	Pca	rs9813022	0.00182084	9.60928e-06	TRUE	6.44601e-06
FinnGen	class Alphaproteobacteria id.2379	Pca	rs140912403	0.00178492	3.84615e-06	TRUE	4.61918e-06
FinnGen	class Alphaproteobacteria id.2379	Pca	rs34569731	0.00139823	3.54356e-07	TRUE	2.86513e-05
FinnGen	class Alphaproteobacteria id.2379	Pca	rs62285697	0.00138317	1.04895e-05	TRUE	0.000113144
FinnGen	class Alphaproteobacteria id.2379	Pca	rs76784716	0.00172919	5.75273e-08	TRUE	2.58484e-06
FinnGen	class Alphaproteobacteria id.2379	Pca	rs7960664	0.00141753	6.77232e-09	TRUE	1.94155e-05
FinnGen	class Alphaproteobacteria id.2379	Pca	rs9813022	0.0016639	9.05214e-06	TRUE	1.73571e-05
FinnGen	family Porphyromonadaceae id.943	Pca	rs10762312	0.00135628	7.06e-08	TRUE	3.22e-05
FinnGen	family Porphyromonadaceae id.943	Pca	rs10858364	0.00146257	1.81e-11	TRUE	1.37e-05
FinnGen	family Porphyromonadaceae id.943	Pca	rs17065783	0.00163343	3.46e-06	TRUE	1.16e-05
FinnGen	family Porphyromonadaceae id.943	Pca	rs1980561	0.00137668	3.71e-06	TRUE	6.34e-05
FinnGen	family Porphyromonadaceae id.943	Pca	rs35233670	0.00139297	1.23e-06	TRUE	3.83e-05
FinnGen	family Porphyromonadaceae id.943	Pca	rs35961441	0.00136086	5.69e-08	TRUE	3.08e-05
FinnGen	family Porphyromonadaceae id.943	Pca	rs6953849	0.00158459	1.15e-06	TRUE	1.06e-05
FinnGen	family Porphyromonadaceae id.943	Pca	rs7330827	0.00133632	2.48e-10	TRUE	3.26e-05
FinnGen	family Porphyromonadaceae id.943	Pca	rs864093	0.00140938	2.23e-06	TRUE	4.15e-05
FinnGen	genus Adlercreutzia id.812	Pca	rs11604400	0.00133074	3.52839e-06	TRUE	8.3495e-05
FinnGen	genus Adlercreutzia id.812	Pca	rs13231526	0.00147457	1.62418e-05	TRUE	9.29826e-05
FinnGen	genus Adlercreutzia id.812	Pca	rs2717140	0.00157386	3.51591e-06	TRUE	1.72446e-05
FinnGen	genus Adlercreutzia id.812	Pca	rs55719207	0.00136676	3.37111e-07	TRUE	3.51201e-05
FinnGen	genus Adlercreutzia id.812	Pca	rs6664405	0.00142771	2.333e-06	TRUE	3.74568e-05
FinnGen	genus Adlercreutzia id.812	Pca	rs7680684	0.00170088	4.95665e-06	TRUE	9.13709e-06
FinnGen	genus Adlercreutzia id.812	Pca	rs9490822	0.00155164	2.68557e-05	TRUE	0.00010023
FinnGen	genus Adlercreutzia id.812	Pca	rs9915817	0.00138304	4.34153e-07	TRUE	3.27385e-05
FinnGen	genus Eubacterium fissicatena group id.14373	Pca	rs10147907	0.00132111	2.97999e-06	TRUE	8.27175e-05
FinnGen	genus Eubacterium fissicatena group id.14373	Pca	rs11818408	0.00139125	3.23113e-06	TRUE	5.42163e-05
FinnGen	genus Eubacterium fissicatena group id.14373	Pca	rs11876297	0.00152026	1.71277e-06	TRUE	1.83003e-05
FinnGen	genus Eubacterium fissicatena group id.14373	Pca	rs151257695	0.00148108	4.12528e-06	TRUE	3.39779e-05
FinnGen	genus Eubacterium fissicatena group id.14373	Pca	rs1768152	0.00135877	2.10127e-06	TRUE	5.66442e-05
FinnGen	genus Eubacterium fissicatena group id.14373	Pca	rs2733072	0.00160982	6.01423e-06	TRUE	1.83923e-05
FinnGen	genus Eubacterium fissicatena group id.14373	Pca	rs3771393	0.00168018	3.39324e-05	TRUE	6.36136e-05
FinnGen	genus Eubacterium fissicatena group id.14373	Pca	rs6934739	0.00135738	1.05674e-05	TRUE	0.000133711
FinnGen	genus Eubacterium fissicatena group id.14373	Pca	rs7104872	0.00157389	1.36162e-06	TRUE	1.19554e-05
FinnGen	genus Eubacterium hallii group id.11338	Pca	rs10501370	0.00146303	2.06e-06	TRUE	2.84e-05
FinnGen	genus Eubacterium hallii group id.11338	Pca	rs10798999	0.00157273	1.84e-06	TRUE	1.33e-05
FinnGen	genus Eubacterium hallii group id.11338	Pca	rs117748144	0.00135697	1.49e-05	TRUE	0.000176949
FinnGen	genus Eubacterium hallii group id.11338	Pca	rs13116360	0.00187678	5.39e-06	TRUE	3.12e-06
FinnGen	genus Eubacterium hallii group id.11338	Pca	rs17074066	0.00129134	1.42e-05	TRUE	0.000255303
FinnGen	genus Eubacterium hallii group id.11338	Pca	rs17474256	0.00134727	7.67e-06	TRUE	0.000114085
FinnGen	genus Eubacterium hallii group id.11338	Pca	rs281379	0.00138494	4.34e-05	TRUE	0.000496595
FinnGen	genus Eubacterium hallii group id.11338	Pca	rs28584818	0.00153854	1.14e-07	TRUE	9.79e-06
FinnGen	genus Eubacterium hallii group id.11338	Pca	rs60254196	0.00152481	4.55e-08	TRUE	1.01e-05
FinnGen	genus Eubacterium hallii group id.11338	Pca	rs630939	0.00138275	9.96e-07	TRUE	3.88e-05
FinnGen	genus Eubacterium hallii group id.11338	Pca	rs6550770	0.00139243	4.67e-06	TRUE	6.41e-05
FinnGen	genus Eubacterium hallii group id.11338	Pca	rs74018587	0.00158681	1.67e-05	TRUE	4.8e-05
FinnGen	genus Eubacterium hallii group id.11338	Pca	rs78056098	0.00138898	1.1e-05	TRUE	0.00011279
FinnGen	genus Eubacterium hallii group id.11338	Pca	rs949971	0.001511	8.11e-07	TRUE	1.58e-05
FinnGen	genus Odoribacter id.952	Pca	rs10093869	0.00148227	2.88e-07	TRUE	1.58e-05
FinnGen	genus Odoribacter id.952	Pca	rs10423795	0.00144209	5.82e-06	TRUE	5.26e-05
FinnGen	genus Odoribacter id.952	Pca	rs28417404	0.0014165	1.63e-05	TRUE	0.000133063
FinnGen	genus Odoribacter id.952	Pca	rs4793970	0.00139016	1.05e-05	TRUE	0.000108513
FinnGen	genus Odoribacter id.952	Pca	rs6856150	0.00144052	5.04e-07	TRUE	2.29e-05
FinnGen	genus Odoribacter id.952	Pca	rs74553962	0.00147616	3.01e-06	TRUE	3.03e-05
FinnGen	genus Odoribacter id.952	Pca	rs77779484	0.00172469	9.02e-08	TRUE	2.76e-06
FinnGen	genus Roseburia id.2012	Pca	rs16910295	0.00152777	1.74069e-07	TRUE	1.09787e-05
FinnGen	genus Roseburia id.2012	Pca	rs2160994	0.00167289	7.8879e-09	TRUE	3.47092e-06
FinnGen	genus Roseburia id.2012	Pca	rs2943022	0.00149324	5.64712e-06	TRUE	3.72785e-05
FinnGen	genus Roseburia id.2012	Pca	rs329182	0.00142334	7.44313e-08	TRUE	2.05687e-05
FinnGen	genus Roseburia id.2012	Pca	rs55858165	0.00136842	1.02042e-05	TRUE	0.000121568
FinnGen	genus Roseburia id.2012	Pca	rs57466170	0.00130331	7.08915e-07	TRUE	6.09972e-05
FinnGen	genus Roseburia id.2012	Pca	rs6930661	0.00153621	2.04722e-06	TRUE	1.75464e-05
FinnGen	genus Roseburia id.2012	Pca	rs78753150	0.00142967	6.40804e-06	TRUE	6.0341e-05
FinnGen	genus Roseburia id.2012	Pca	rs9300744	0.00151703	9.16122e-06	TRUE	4.41315e-05
FinnGen	genus Holdemania id.2157	Pca	rs10885477	0.00139886	1.14e-10	TRUE	2.13e-05
FinnGen	genus Holdemania id.2157	Pca	rs11080063	0.00137613	2.51e-06	TRUE	5.4e-05
FinnGen	genus Holdemania id.2157	Pca	rs111745969	0.00143919	7.04e-06	TRUE	6.02e-05
FinnGen	genus Holdemania id.2157	Pca	rs113593397	0.0014539	3.59e-07	TRUE	1.98e-05
FinnGen	genus Holdemania id.2157	Pca	rs116500994	0.00153433	3.06e-05	TRUE	0.000130694
FinnGen	genus Holdemania id.2157	Pca	rs12701617	0.00136455	2.29e-06	TRUE	5.62e-05
FinnGen	genus Holdemania id.2157	Pca	rs1867876	0.00188467	4.57e-05	TRUE	3.07e-05
FinnGen	genus Holdemania id.2157	Pca	rs4146507	0.00140792	8.83e-10	TRUE	2.02e-05
FinnGen	genus Holdemania id.2157	Pca	rs73139538	0.00143741	8.76e-06	TRUE	7.05e-05
FinnGen	genus Holdemania id.2157	Pca	rs77293403	0.00161803	1.87e-07	TRUE	6.04e-06
FinnGen	genus Holdemania id.2157	Pca	rs80149660	0.0014059	3.99e-06	TRUE	5.43e-05
FinnGen	genus Holdemania id.2157	Pca	rs9500080	0.0018729	3.63e-06	TRUE	2.54e-06
FinnGen	genus Holdemania id.2157	Pca	rs9529719	0.00148555	1.67e-08	TRUE	1.26e-05
FinnGen	genus Holdemania id.2157	Pca	rs967319	0.00138997	1.77e-05	TRUE	0.000169438
FinnGen	genus Flavonifractor id.2059	Pca	rs114873521	0.00136563	5.4e-06	TRUE	8.23e-05
FinnGen	genus Flavonifractor id.2059	Pca	rs11811696	0.00161864	4.03e-06	TRUE	1.38e-05
FinnGen	genus Flavonifractor id.2059	Pca	rs12030302	0.00176984	2.38e-05	TRUE	2.35e-05
FinnGen	genus Flavonifractor id.2059	Pca	rs34066017	0.00159689	1.08e-05	TRUE	3.03e-05
FinnGen	genus Flavonifractor id.2059	Pca	rs806808	0.00166646	3.2e-05	TRUE	6.37e-05
FinnGen	genus Allisonella id.2174	Pca	rs1901739	0.00151348	1.78e-09	TRUE	9.93e-06
FinnGen	genus Allisonella id.2174	Pca	rs35110698	0.00145185	1.52e-06	TRUE	2.76e-05
FinnGen	genus Allisonella id.2174	Pca	rs35778461	0.00170013	1.59e-05	TRUE	2.27e-05
FinnGen	genus Allisonella id.2174	Pca	rs594561	0.00138824	1.05e-05	TRUE	0.000109447
FinnGen	genus Allisonella id.2174	Pca	rs602075	0.00225818	1.5e-05	TRUE	6.91e-07
FinnGen	genus Allisonella id.2174	Pca	rs6742198	0.00155033	7.9e-07	TRUE	1.21e-05
FinnGen	genus Allisonella id.2174	Pca	rs76904847	0.00137345	7.36e-07	TRUE	3.85e-05
FinnGen	genus Allisonella id.2174	Pca	rs7898615	0.00141121	3.52e-05	TRUE	0.0003222
FinnGen	genus Dorea id.1997	Pca	rs11150408	0.00139917	1.9543e-05	TRUE	0.000176405
FinnGen	genus Dorea id.1997	Pca	rs12537781	0.00137357	1.35815e-06	TRUE	4.47551e-05
FinnGen	genus Dorea id.1997	Pca	rs1899291	0.00150243	5.58909e-06	TRUE	3.49378e-05
FinnGen	genus Dorea id.1997	Pca	rs3005511	0.00146017	9.51655e-06	TRUE	6.49048e-05
FinnGen	genus Dorea id.1997	Pca	rs345219	0.00136166	2.39565e-06	TRUE	5.82822e-05
FinnGen	genus Dorea id.1997	Pca	rs3752849	0.00139847	1.69849e-05	TRUE	0.000154587
FinnGen	genus Dorea id.1997	Pca	rs62503162	0.00175259	1.48384e-07	TRUE	2.39662e-06
FinnGen	genus Coprobacter id.949	Pca	rs12684609	0.00146141	4.64827e-06	TRUE	4.10218e-05
FinnGen	genus Coprobacter id.949	Pca	rs12996055	0.00135291	1.4638e-06	TRUE	5.24218e-05
FinnGen	genus Coprobacter id.949	Pca	rs213863	0.00154905	6.26509e-06	TRUE	2.78009e-05
FinnGen	genus Coprobacter id.949	Pca	rs28402691	0.00135573	6.11428e-07	TRUE	4.17547e-05
FinnGen	genus Coprobacter id.949	Pca	rs3828477	0.00151672	6.05222e-06	TRUE	3.34427e-05
FinnGen	genus Coprobacter id.949	Pca	rs72821405	0.00148063	1.72525e-06	TRUE	2.37967e-05
FinnGen	genus Coprobacter id.949	Pca	rs74919520	0.00144496	3.20034e-06	TRUE	3.80835e-05
FinnGen	order Rhodospirillales id.2667	Pca	rs1035406	0.00149392	2.47e-07	TRUE	1.44e-05
FinnGen	order Rhodospirillales id.2667	Pca	rs11591293	0.00145732	4.17e-07	TRUE	1.98e-05
FinnGen	order Rhodospirillales id.2667	Pca	rs11630875	0.00152625	3.47e-07	TRUE	1.21e-05
FinnGen	order Rhodospirillales id.2667	Pca	rs13336560	0.0013682	1.61e-06	TRUE	4.88e-05
FinnGen	order Rhodospirillales id.2667	Pca	rs1549633	0.00147732	5.01e-06	TRUE	3.86e-05
FinnGen	order Rhodospirillales id.2667	Pca	rs3730086	0.00139981	8.76e-06	TRUE	8.94e-05
FinnGen	order Rhodospirillales id.2667	Pca	rs3754624	0.00157131	1.98e-06	TRUE	1.38e-05
FinnGen	order Rhodospirillales id.2667	Pca	rs4278423	0.00141409	4.04e-06	TRUE	5.18e-05
FinnGen	order Rhodospirillales id.2667	Pca	rs61933850	0.00145817	3.32e-06	TRUE	3.55e-05
FinnGen	order Rhodospirillales id.2667	Pca	rs7001029	0.00149366	8.3e-06	TRUE	4.76e-05
FinnGen	order Rhodospirillales id.2667	Pca	rs76784716	0.00159705	5.75e-08	TRUE	6.28e-06
FinnGen	order Rhodospirillales id.2667	Pca	rs77304857	0.00140717	7.43e-07	TRUE	3.08e-05
FinnGen	order Rhodospirillales id.2667	Pca	rs9813022	0.00182084	9.05e-06	TRUE	6.47e-06
*SNPs with “TRUE” MR Steiger results suggest causality in the expected direction (ie, thoses explaining more variance in exposure than in outcome) and will not be removed from the study.
